# Supplementary material
Source: PubMed Central journal article supplement (PMC2234147)

### Shikimate pathway

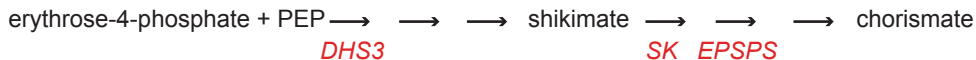

### Aromatic AA metabolism, tryptophan

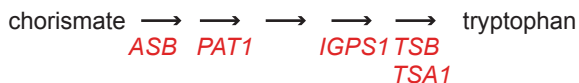

### Aromatic AA metabolism, phenylalanine

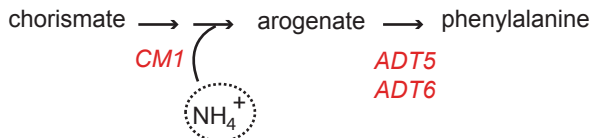

### NH<sub>4</sub><sup>+</sup> recycling

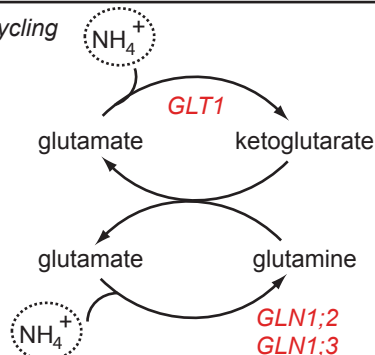

### Phenylpropanoid pathway

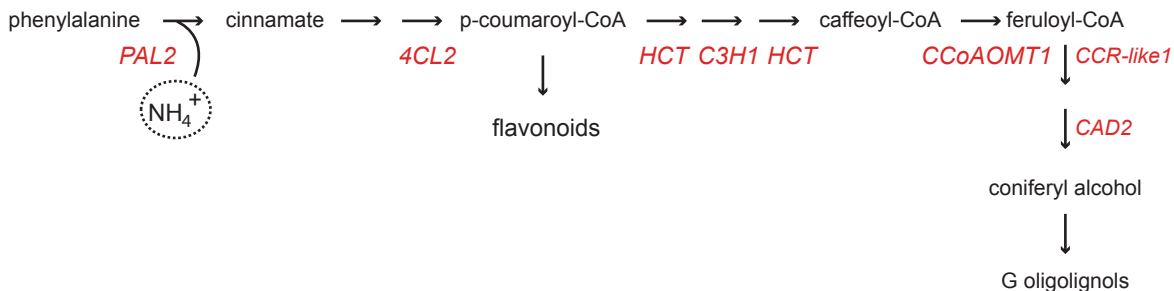

Supplement: pnas_0711203105_4.pdf [file pnas_0711203105_4.pdf]
